# Supplementary material
Source: Springer Nature journal article supplement (https://www.springermedizin.de/resource/supplementary/12936_2009_868_MOESM5_ESM.pdf/9548416)
Supplement: MOESM5 [file 9548416]

**Malaita  
FGDs**

**Coastal  
village**

**Gwaunaru**

**Heads of  
House-  
holds  
(n=10)**

**Primary  
Care-  
givers  
(n=9)**

**Youths  
(n=10)**

**Inland  
village**

**Busurata**

**Heads of  
House-  
holds  
(n=9)**

**Primary  
Care-  
givers  
(n=10)**

**Youth  
(n=10)**

**Temotu  
FGDs**

**Coastal  
village**

**Otomongi**

**Heads of  
House-  
holds  
(n=8)**

**Primary  
Care-  
givers  
(n=10)**

**Youths  
(n=9)**

**Inland  
village**

**Noipe**

**Heads of  
House-  
holds  
(n=12)**

**Primary  
Care-  
givers  
(n=10)**

**Youth  
(n=10)**
